# Supplementary material
Source: publisher figshare collection journal article supplement (https://frontiersin.figshare.com/ndownloader/files/30819379)
Supplement: Supplementary file [file 30819379]

| Brain area | Protein | Sex     | Figure    | SAL_A | CFA_A | SAL_R | CFA_R |
|------------|---------|---------|-----------|-------|-------|-------|-------|
| PFC        | pNFκB   | females | Figure 2A | -     | -     | +     | +     |
|            |         | males   | Figure 2J |       |       |       |       |
|            | iNOS    | females | Figure 2D | +     | +     | -     | -     |
|            |         | males   | Figure 2M | -     | +/+   |       | -     |
|            | COX2    | females | Figure 2G |       | -     |       | +     |
|            |         | males   | Figure 2P | -     | +/+   |       | -     |
|            | IBA1    | females | Figure 3A | +     | -/-   |       | +     |
|            |         | males   | Figure 3B |       |       |       |       |
|            | IL1β    | females | Figure 4A | -     | -     | +     | +     |
|            | IL10    | females | Figure 4B | +     | +     | -     | -     |
| NAC        | pNFκB   | females | Figure 2B |       |       |       |       |
|            |         | males   | Figure 2K |       |       |       |       |
|            | iNOS    | females | Figure 2E |       |       |       |       |
|            |         | males   | Figure 2N |       |       |       |       |
|            | COX2    | females | Figure 2H |       |       |       |       |
|            |         | males   | Figure 2Q |       |       |       |       |
|            | IBA1    | females | Figure 3C | -     | +     | -     | +     |
|            |         | males   | Figure 3D |       |       |       |       |
|            | IL1β    | females | Figure 4C |       | -     | -     | +/+   |
|            | IL10    | females | Figure 4D | +     | -     | +     | -     |
| VTA        | pNFκB   | females | Figure 2C | -/-   | +/+   | +     | -     |
|            |         | males   | Figure 2L |       |       |       |       |
|            | iNOS    | females | Figure 2F |       |       | -     | +     |
|            |         | males   | Figure 2O |       |       |       |       |
|            | COX2    | females | Figure 2I |       |       |       |       |
|            |         | males   | Figure 2R |       |       |       |       |
|            | IBA1    | females | Figure 3E |       |       |       |       |
|            |         | males   | Figure 3F |       |       |       |       |
|            | MOR     | females | Figure 4G |       |       |       |       |
|            |         | males   | Figure 4J |       |       |       |       |
